# Supplementary material for: Crystal engineering approach to produce complex of azelnidipine with maleic acid
Source: Royal Society of Chemistry journal article supplement (doi:10.1039/c3ce26967a), 2013-01-01
Supplement: c3ce26967a.pdf [file c3ce26967a.pdf]

## Supporting information

Table 1 The solubility of azelnidipine and the complex in water and 20% ethenol (µg/ml).

| T/°C | Water        |             | 20% Ethenol  |             |
|------|--------------|-------------|--------------|-------------|
|      | azelnidipine | The complex | azelnidipine | The complex |
| 25   | -            | -           | -            | 15.68       |
| 31   | -            | 0.13        | -            | 27.27       |
| 37   | -            | 6.7         | 0.69         | 79.22       |
| 42   | -            | 7.9         | 0.81         | 94.60       |

\*The signal of “-” indicates the concentration of azelnidipine can not be detected by HPLC.
